# Supplementary material for: Towards MRI axon radius mapping in clinical settings: insights from MRI-scale histology and experimental validation
Source: Research Square preprint supplement (doi:10.21203/rs.3.rs-6114978/v1), 2025-03-04
Supplement: Supplementary file 1 [file 88240fb8520753e591829d47.pdf]

# Supplementary Information for: Towards MRI axon radius mapping in clinical settings: insights from MRI-scale histology and experimental validation

Laurin Mordhorst<sup>1,2\*</sup>, Luke J. Edwards<sup>3</sup>, Maria Morozova<sup>3,4</sup>,  
Mohammad Ashtarayeh<sup>2</sup>, Tobias Streubel<sup>2</sup>, Björn Fricke<sup>1,2</sup>,  
Francisco J. Fritz<sup>2</sup>, Henriette Rusch<sup>4</sup>, Carsten Jäger<sup>3,4</sup>,  
Ludger Starke<sup>5</sup>, Thomas Gladysz<sup>5</sup>, Ehsan Tasbihi<sup>5,6</sup>,  
Joao S. Periquito<sup>5</sup>, Andreas Pohlmann<sup>5</sup>, Thoralf Niendorf<sup>5,6</sup>,  
Nikolaus Weiskopf<sup>3,7,8</sup>, Markus Morawski<sup>3,4</sup>,  
Siawoosh Mohammadi<sup>1,2,9\*</sup>

<sup>1</sup>Department, University Hospital of Luebeck, Luebeck, Germany.

<sup>2</sup>Institute of Systems Neuroscience, University Medical Center  
Hamburg-Eppendorf, Hamburg, Germany.

<sup>3</sup>Department of Neurophysics, Max Planck Institute for Human  
Cognitive and Brain Sciences, Leipzig, Germany.

<sup>4</sup>Paul Flechsig Institute - Centre of Neuropathology and Brain Research,  
Medical Faculty, Leipzig University, Leipzig, Germany.

<sup>5</sup>Berlin Ultrahigh Field Facility (B.U.F.F.), Max Delbrück Center for  
Molecular Medicine in the Helmholtz Association, Berlin, Germany.

<sup>6</sup>Charité – Universitätsmedizin Berlin, Berlin, Germany.

<sup>7</sup>Felix Bloch Institute for Solid State Physics, Leipzig University,  
Leipzig, Germany.

<sup>8</sup>Wellcome Centre for Human Neuroimaging, Institute of Neurology,  
University College London, London, United Kingdom.

<sup>9</sup>Max Planck Research Group MRI Physics, Max Planck Institute for  
Human Development, Berlin, Germany.

Contributing authors: [laurin.mordhorst@uni-luebeck.de](mailto:laurin.mordhorst@uni-luebeck.de);  
[siawoosh.mohammadi@uni-luebeck.de](mailto:siawoosh.mohammadi@uni-luebeck.de);

## SI1 Axon radius distributions from light microscopy

Fig. S1 shows axon radius distributions from our two histological tissue samples for five regions of the corpus callosum: genu, anterior midbody, midbody, posterior midbody, and splenium. Axon radius distributions and  $r_{\text{eff}}$  are similar across tissue samples (see Fig. S1c-f), except for the genu (see Fig. S1b). Yet, tissue sample CC-02 generally exhibits slightly higher  $r_{\text{eff}}$  than CC-01. The pattern of  $r_{\text{eff}}$  across anterior midbody, midbody, posterior midbody, and splenium (see Fig. S1c-f) follows an alternating low-high pattern.

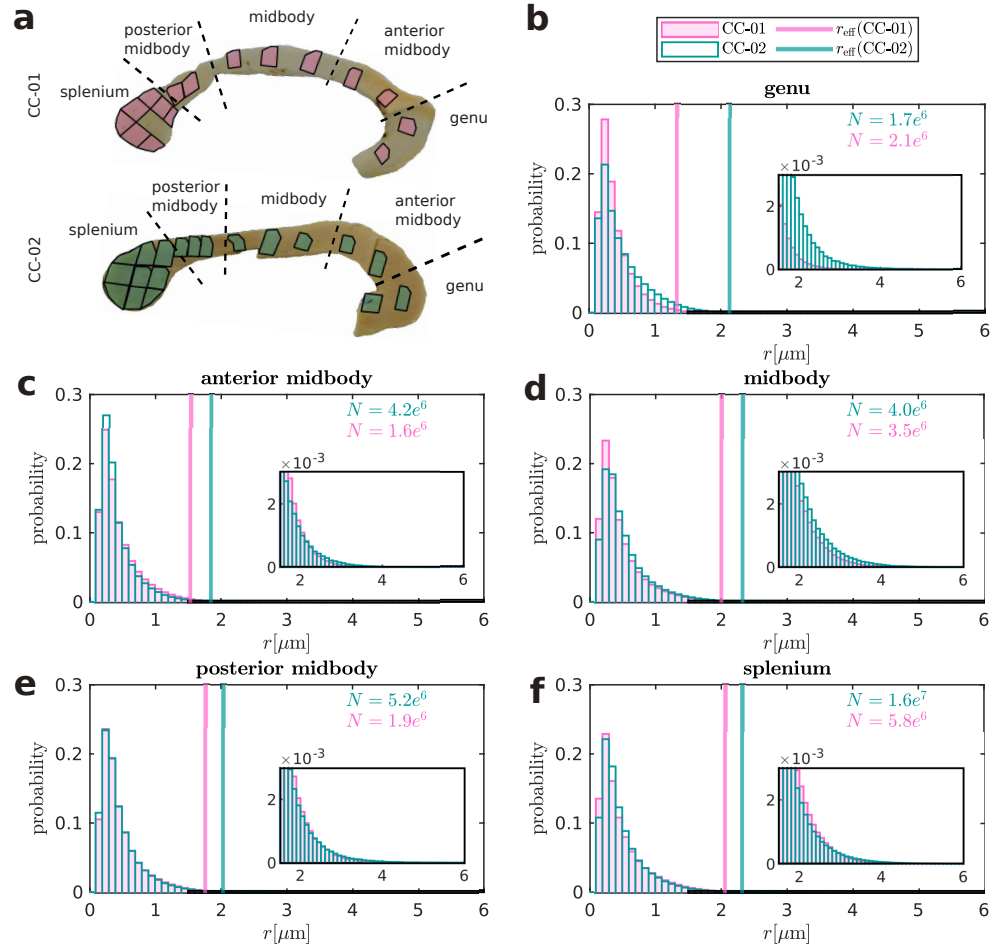

**Fig. S1** Axon radius distributions from light microscopy. **(a)** Corpus callosum sketch with light microscopy ROIs (polygons) and segmentation into five regions (dashed lines). **(b-f)** Axon radius distributions pooled over the light microscopy ROIs for each corpus callosum region shown in (a). Colors indicate tissue sample (see legend in (b)). Vertical lines denote  $r_{\text{eff}}$  as per Eq. (1). Annotated numbers inside the plot denote axon count. Insets highlight the tail of axon radius distributions.

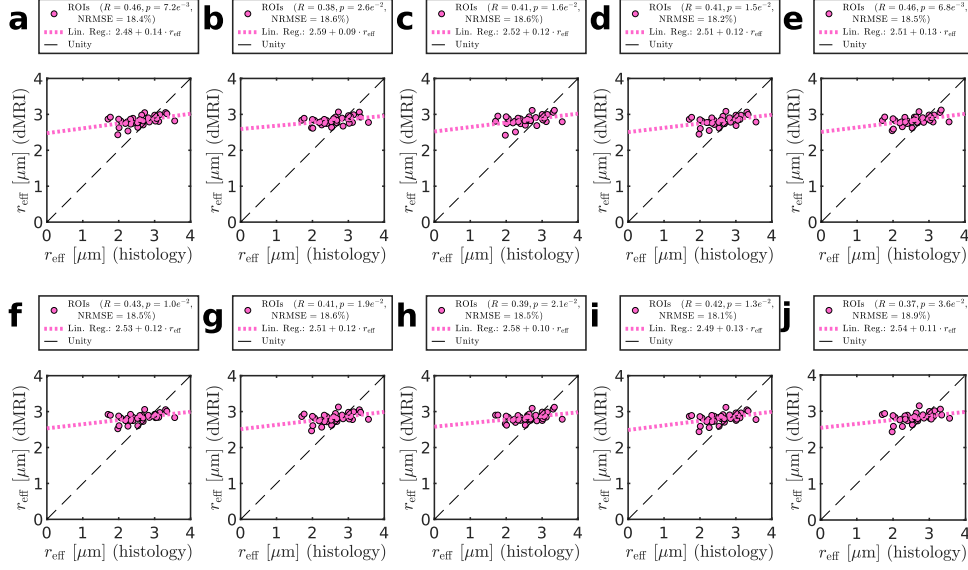

**Fig. S2 Reproducibility of correlation between in-vivo dMRI-based  $r_{\text{eff}}$  and histological  $r_{\text{eff}}$ .** (a-j) Quantitative comparisons of  $r_{\text{eff}}$  from in-vivo dMRI against histology. Each plot represent one of ten repeated runs through our in-vivo processing pipeline. Markers represent histological ROIs from Fig. 1a, with in-vivo dMRI-based  $r_{\text{eff}}$  reflecting the group-average. The dashed lines illustrate theoretical perfect agreement. The legends provide metrics computed over all ROIs, including Pearson’s correlation coefficient ( $R$ ) with corresponding  $p$ -value, and the normalized root-mean-square error (NRMSE) (see Section 4.7 for metric definitions).

## SI2 Reproducibility of correlation between in-vivo dMRI-based $r_{\text{eff}}$ and histological $r_{\text{eff}}$

In-vivo dMRI-based  $r_{\text{eff}}$  exhibited some variability due to the non-deterministic nature of our processing pipeline (see Section 4.4). To assess the impact of this variability on correlation, we repeated the quantitative analysis in Fig. 2k for ten separate runs of the pipeline.

Qualitatively, comparison group-average  $r_{\text{eff}}$  from in-vivo dMRI show a consistent trend across all iterations. Pearson’s  $R$  varied between 0.37 ( $p = 3.6e^{-2}$ , see Fig. S2j) to 0.46 ( $p \approx 7e^{-3}$ , see Fig. S2a,e), with a mean of  $R = 0.414 \pm 0.03$ . All correlations were statistically significant ( $p < 0.05$ ).

## SI3 Per-subject analyses for in-vivo dMRI-based $r_{\text{eff}}$

While Fig. 2i,l in the main manuscript presents group-average  $r_{\text{eff}}$  for our in-vivo dMRI experiments, here we show per-subject results, including both spatial patterns across the corpus callosum (see Fig. S3a-e) and quantitative comparisons with histology (see Fig. S3f-j).

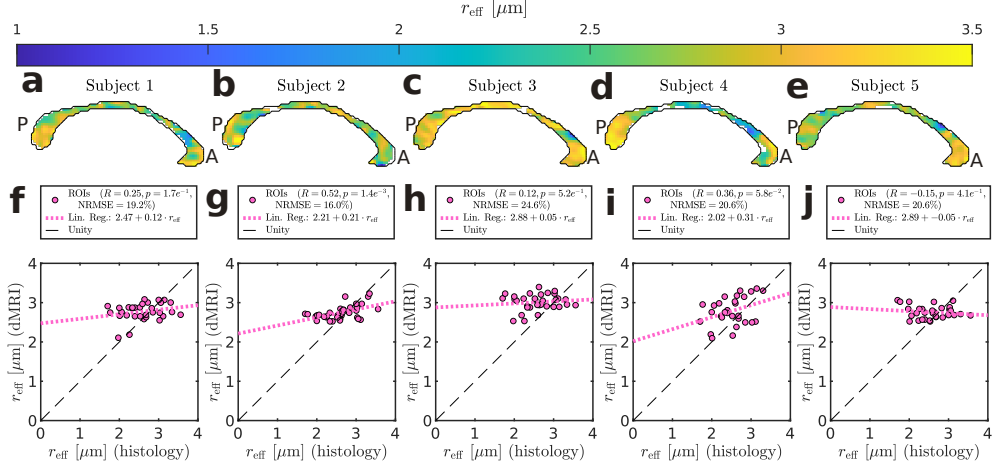

**Fig. S3 Per-subject analyses for in-vivo dMRI-based  $r_{\text{eff}}$**  (a-e) Per-subject spatial patterns of  $r_{\text{eff}}$  across the corpus callosum, shown in mid-sagittal section of MNI space. (f-j) Per-subject quantitative comparison of in-vivo dMRI-based  $r_{\text{eff}}$  against histology. Markers represent histological ROIs in Fig. 1a. The dashed lines illustrate theoretical perfect agreement. The legends provide metrics computed over all ROIs, including Pearson’s correlation coefficient ( $R$ ) and the corresponding  $p$ -value, the normalized root-mean-square error (NRMSE) (see Section 4.7 for metric definitions).

The spatial  $r_{\text{eff}}$  patterns are consistent across subjects in showing higher values in the genu and splenium and lower values in the anterior midbody. However, overall, inter-subject variability appears to be substantial. This variability is also reflected in the quantitative comparisons with histology: while  $r_{\text{eff}}$  generally increases with histological values for most subjects (see Fig. 2f-i), there’s a significant correlation with histology only for one subject (see Fig. 2g).

#### SI4 Impact of $f_{\text{im}}$ on ex-vivo dMRI-based $r_{\text{eff}}$

Ex-vivo dMRI-based  $r_{\text{eff}}$  estimation relies on estimating of  $f_{\text{im}}$  (see Section 4.3 for our approach). Fig. S4 illustrates how this estimation affects  $r_{\text{eff}}$ , showing both spatial patterns (see Fig. S4a-b) and the relationship between  $r_{\text{eff}}$  and  $f_{\text{im}}$  (see Fig. S4c).

The spatial pattern of  $r_{\text{eff}}$  suggest a relationship with  $f_{\text{im}}$ . This relationship is particularly evident in the splenium, where sampling density is highest. The quantitative comparison in Fig. S4c further supports this by showing that  $r_{\text{eff}}$  scales approximately linearly with  $f_{\text{im}}$  in the splenium. These findings indicate that  $f_{\text{im}}$  is a confounding factor in  $r_{\text{eff}}$  estimation, at least for our  $f_{\text{im}}$  estimation approach.

#### SI5 Scaling behavior of the model-inherent bias across broader $r_{\text{eff}}$ ranges

The simulations in Fig. 2n suggest that the model-inherent bias of  $r_{\text{eff}}$  in dMRI scales proportionally with histological  $r_{\text{eff}}$ . To investigate this scaling behavior across

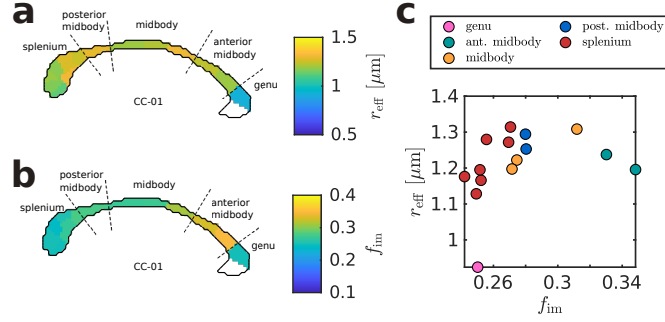

**Fig. S4 Impact of  $f_{\text{im}}$  on ex-vivo dMRI-based  $r_{\text{eff}}$**  (a) Spatial patterns of ex-vivo dMRI-based  $r_{\text{eff}}$  across the corpus callosum, shown in mid-sagittal MNI slice with subregions indicated (dashed lines). Spatial patterns were interpolated using the nearest-neighbor method, evaluated at the ROI locations in Fig. 1a. The void in the genu indicates a ROI not scanned with ex-vivo dMRI (see Fig. 5e). (b) Corresponding spatial pattern of  $f_{\text{im}}$ . (c) Relationship between  $f_{\text{im}}$  and  $r_{\text{eff}}$ . Each marker represents one ROI from Fig. 1a, with marker colors indicating corpus callosum subregions as defined by dashed lines in (a-b).

a broader range of histological  $r_{\text{eff}}$  values, we extended simulations to mimic different axon populations beyond the corpus callosum. Fig. S5a illustrates this approach: Using our histological axon radius distributions of the corpus callosum as a primary dataset, we scaled axon radii to extrapolate axon radius distributions of the rat corpus callosum (scaling factor: 0.5 [14]) and the human corticospinal tract (scaling factor: 1.15 [5]). For in-vivo simulations, these scaling factors were applied alongside the tissue shrinkage compensation factor (1.3). For example, we used the scaling factor  $1.15 \cdot 1.3 \approx 1.5$  for in-vivo corticospinal tract simulations.

Fig. S5b-f show comparisons of  $r_{\text{eff}}$  from dMRI simulations against histological values across all ROIs. Generally, the model-inherent bias causes strong deviations from the unity line for large  $r_{\text{eff}}$ , resulting in a reduced dynamic range as indicated by the slopes of linear regressions. Notably, the model-inherent bias scales non-linearly with  $r_{\text{eff}}$ , showing a tendency toward saturation at large  $r_{\text{eff}}$ . Additionally, the model-inherent bias also scales with  $g_{\text{max}}$  (see titles of Fig. S5b-f), resulting in very strong deviations for in-vivo next-generation research scanners or ex-vivo preclinical scanners (see Fig. S5e-f).

## SI6 The origins of the model-inherent bias

The simulations in Fig. 2m reveal a model-inherent bias of dMRI-based  $r_{\text{eff}}$ . Here, we investigate the origins of this bias by assessing the signal approximations involved in deriving  $r_{\text{eff}}$  (see Section A). These approximations, applied in sequence, include:

- the Gaussian phase approximation (GPA; see Eq. (A5)),
- the wide pulse approximation (WPA; see Eq. (A6)),
- the Taylor approximation (see Eq. (A9)),
- the exponential approximation (see Eq. (A10)).

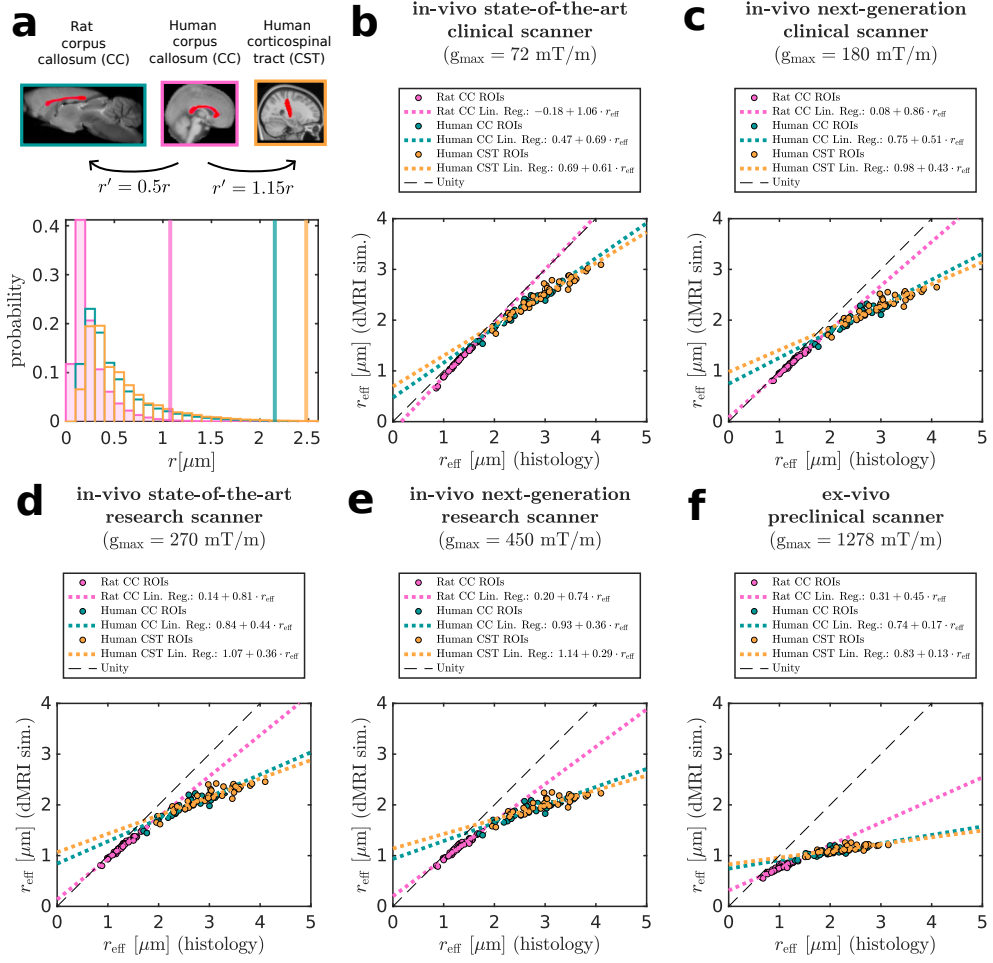

**Fig. S5 Scaling behavior of the model-inherent bias across broader  $r_{\text{eff}}$  ranges.** (a) Axon radius distributions for different populations: rat corpus callosum (green), human corpus callosum (magenta), and human corticospinal tract (orange). Vertical lines indicate  $r_{\text{eff}}$  values computed from these distributions. The human corpus callosum data is the primary dataset, whereas the other axon populations were extrapolated by scaling each radius from human corpus callosum distributions as annotated (see arrows). Distributions reflect the ex-vivo scenario, whereas for in-vivo simulations, we accounted for tissue shrinkage by scaling with an additional factor of 1.3 [31, 38]. textbf(b-f) Comparison of  $r_{\text{eff}}$  from idealized dMRI simulations ( $\text{SNR} = \infty$ ) against histological  $r_{\text{eff}}$  for: optimal in-vivo protocols determined in Fig. 3 (corresponding to markers for "SNR baseline level: reference") and (e) our experimental ex-vivo protocol. Marker/line colors indicate axon population as in (a). Dashed lines illustrate theoretical perfect agreement; dotted lines are linear regressions per axon population. The full set of protocol parameters is given in Table S1 for in-vivo protocols (see table rows with  $\eta = 1.3$ ), whereas the ex-vivo protocol is described in Section 4.3.

We evaluated the accuracy of these approximations at the level of the powder-averaged signal  $S^\circ(b, H(r))$  (see Eq. (A7)) – the signal to which  $r_{\text{eff}}$  is fitted. While the Taylor approximation and exponential approximation directly model  $S^\circ(b, H(r)) \approx S^\circ(b, r_{\text{eff}})$ , the matrix method, the GPA and the WPA model signals per gradient direction  $S(b, \vec{g}, H(r))$  as per Eq. (A1). For the latter methods, we first simulated  $S(b, \vec{g}, H(r))$  and then estimated  $S^\circ(b, H(r))$  using a Gaussian maximum likelihood estimator.

Fig. S6 shows  $S^\circ(b, H(r))$  simulated using each of these approaches for both the optimal in-vivo dMRI protocols for different scanners identified in Fig. 3 and our experimental ex-vivo dMRI protocol.

#### ***The Taylor approximation drives the model-inherent bias***

The Taylor approximation introduces the largest deviations between successive approximations, while the WPA results in smaller but noticeable deviations, and the GPA causes almost none. Notably, for both Taylor approximation and WPA, deviations increase for protocols with high  $g_{\text{max}}$  and are generally less pronounced for  $S^\circ(b_{\text{min}}, H(r))$  (see Fig. S6a-e) compared to  $S^\circ(b_{\text{max}}, H(r))$  (see Fig. S6f-j).

#### ***The dependency of the model-inherent bias on $r_{\text{eff}}$ and $g_{\text{max}}$***

The observed scaling of deviations with  $r_{\text{eff}}$  and  $g_{\text{max}}$  for the Taylor approximation and the WPA can be understood by examining their underlying dependencies. For the Taylor approximation, accuracy improves when the necessary but not sufficient condition  $\kappa r_{\text{eff}}^4 \ll 1$  is satisfied. While the violation of this condition with increasing  $r_{\text{eff}}$  is evident, its violation with increasing  $g$  is implicit in the quadratic dependency  $g^2 \sim \kappa = \frac{7}{48} \frac{g^2 \gamma^2 \delta}{D_0}$ . Similarly, the deviations caused by the WPA ( $\delta \gg r^2/D_0$ ) are related to both  $r_{\text{eff}}$  and  $g_{\text{max}}$ . Higher  $r_{\text{eff}}$  are linked to the prevalence of larger  $r$ , making the assumption less valid, while higher  $g_{\text{max}}$  typically allow for shorter  $\delta$ , further undermining the assumption. In ex-vivo dMRI, the reduced  $D_0$  further amplifies the deviations due to both Taylor approximation and WPA.

#### ***Powder-averaged signals decay near-linearly for high $g_{\text{max}}$***

Interestingly,  $S^\circ(b, H(r))$  appears to decay almost linearly with  $r_{\text{eff}}$  for protocols with high  $g_{\text{max}}$ . This behavior suggests an intrinsic property of the signal model, warranting further exploration.

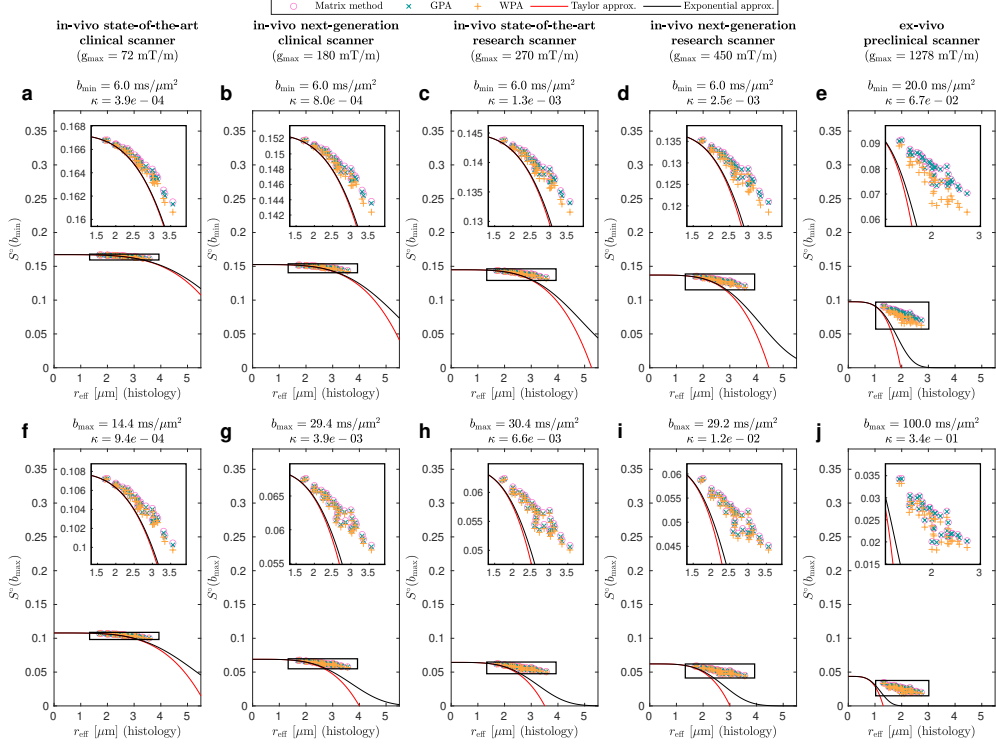

**Fig. S6 The origins of the model-inherent bias.** (a-e) Simulated powder-averaged signals  $S^\circ(b_{\min})$  for the lowest  $b$ -shell of the protocol with  $b = b_{\min}$ . Columns indicate different scanners/protocols with varying maximum gradient amplitude  $g_{\max}$  (see titles): (a-d) optimal in-vivo protocols determined in Fig. 3 (corresponding to markers for "SNR baseline level: reference") and (e) our experimental ex-vivo protocol. Marker symbols/lines denote different methods to simulate  $S^\circ(b_{\min})$ , arranged in order of successive simplifications during derivation of  $r_{\text{eff}}$  from left to right in the legend. Distinct markers reflect simulations for ROIs in Fig. 1a, whereas lines reflect  $S^\circ(b)$  signal models. The  $\kappa$  values, annotated above plots, are protocol-specific factors used in the wide pulse approximation (WPA; see Eq. (A6)). The  $b_{\min}$  values were chosen to suppress extra-axonal signal and depend only on experimental conditions (in-vivo vs. ex-vivo, see annotation above plots). (f-j) Simulated  $S^\circ(b_{\max})$  for the highest  $b$ -shell of the protocol with  $b = b_{\max}$ , with definitions as in (a-e). The  $b_{\max}$  values vary across protocols (see annotation above plots). The full set of protocol parameters is given in Table S1 for in-vivo protocols (see rows with  $\eta = 1.3$ ), whereas the ex-vivo protocol is described in Section 4.3.

## SI7 dMRI protocol optimization (additional results)

We optimized in-vivo dMRI protocols in Section 2.3 assuming a radius scaling factor  $\eta = 1.3$  for tissue shrinkage compensation [31, 38]. Here we repeated in-vivo protocol optimization for  $\eta = 1.0$  and  $\eta = 1.5$ , representing more extreme scenarios of no tissue shrinkage and very strong tissue shrinkage. As in Section 2.3, we conducted the protocol optimization analyses with increased baseline SNR levels to study the potential impact of technical or acquisition improvements.



Fig. S7 shows  $R$  and NRMSE as a function of  $g_{\max}$  for different  $\eta$ . For any  $\eta$ ,  $R$  curves show similar qualitative behavior, converging to a maximum  $R$  for a certain  $g_{\max}$  (see Fig. S7a-c), roughly coinciding with optimal NRMSE (see Fig. S7d-f). Yet, for  $\eta = 1$ , this  $g_{\max}$  is outside the range of values of existing in-vivo scanners at reference SNR baseline level (see Fig. S7a). For  $\eta \geq 1.3$  optimal  $R$  can be achieved with existing scanners (see Fig. S7b-c), with NRMSE becoming suboptimal (larger) for higher  $g_{\max}$  (see Fig. S7e-f).

Fig. S8 shows comparisons of simulated  $r_{\text{eff}}$  estimates against histological values for the optimal protocols across different scanners, complementing the metrics shown in Fig. S7. These plots illustrate that  $R$  and NRMSE are determined by precision rather than bias for small  $\eta$  and  $g_{\max}$ . Yet, at large  $\eta$  and  $g_{\max}$ , the model-inherent bias strongly reduces the sensitivity to large axons, leading to the non-optimal NRMSE at high  $g_{\max}$  values observed in Fig. S7e-f.

Table S1 show the optimal parameters for protocols presented in Figs. S7 and S8. The parameters for  $\eta = 1.3$  correspond to the optimal parameters shown in the main manuscript (see Section 2.3).

## SI8 Influence of Gaussian and Rician noise on $r_{\text{eff}}$ estimation

We used Rician-distributed magnitude dMRI for our experimental validation of  $r_{\text{eff}}$ , shown in Fig. 2k. To mimic these conditions, we also incorporated Rician noise into our dMRI simulations (see Fig. 2l). For comparison, we replicated these simulations using Gaussian noise to assess the potential improvements achievable with Gaussian-distributed signals, assuming such distributions can be achieved through advanced preprocessing techniques [16, 39, 41].

Fig. S9a-b compare the impact of Gaussian and Rician noise on  $r_{\text{eff}}$  from dMRI simulations against histological  $r_{\text{eff}}$ , both for the ex-vivo and in-vivo scenario. In ex-vivo dMRI simulations (see Fig. S9a), the noise distribution has little impact, likely due to the large number of diffusion measurements (585 directions across shells). In-vivo (see Fig. S9b), Gaussian noise allows for better precision than Rician noise, translating into improved  $R$  and NRMSE. It should be noted that the impact of Rician noise on  $r_{\text{eff}}$  estimates is likely underestimated here, as the noise level  $\sigma$  was assumed to be known in our simulations. In practice,  $\sigma$  is typically unknown and must be estimated. This  $\sigma$ -estimation, likely imperfect, can be expected to propagate additional errors into  $r_{\text{eff}}$ .

## SI9 Impact of spatial smoothing on in-vivo dMRI-based $r_{\text{eff}}$

In the main manuscript, we applied spatial smoothing to in-vivo dMRI-based  $r_{\text{eff}}$  maps prior to comparison with histological values (see Fig. 2h,l). In Fig. S10, we illustrate the impact of spatial smoothing on  $r_{\text{eff}}$ , including both a spatial  $r_{\text{eff}}$  pattern for an exemplary subject in native space (see Fig. S10a-b) and its effect on the quantitative comparison with histology for the group-average  $r_{\text{eff}}$  (see Fig. S10c-d).

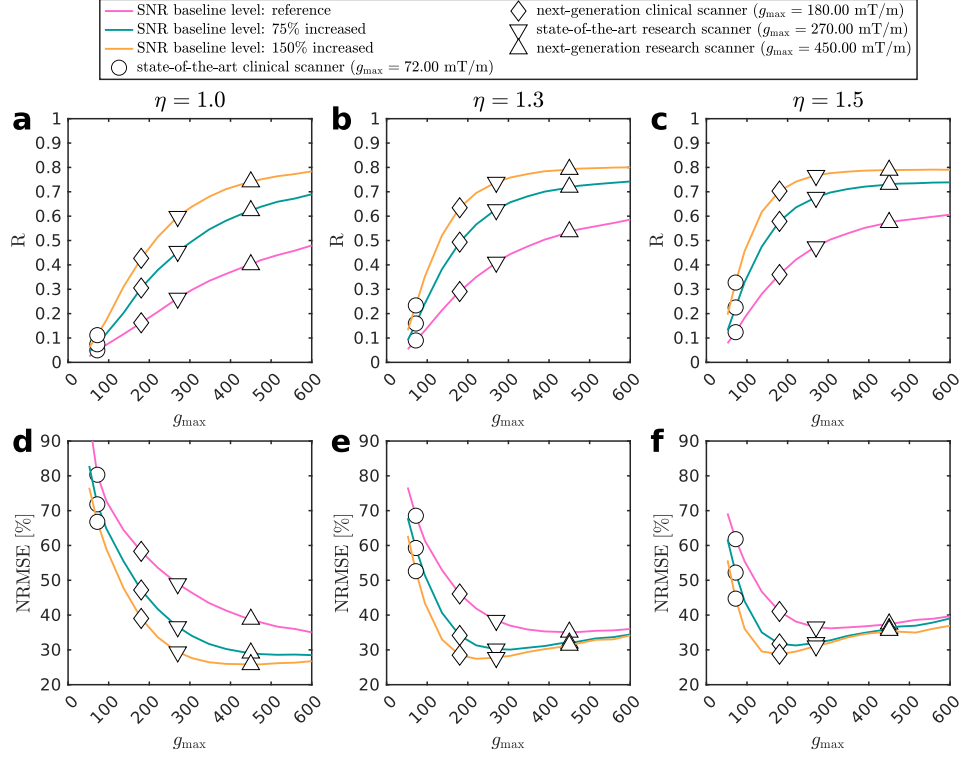

**Fig. S7 Optimal in-vivo protocol metrics for different axon radius scaling factors.** (a-c) Optimal Pearson's correlation coefficients ( $R$ ) as a function of maximum gradient amplitude ( $g_{\max}$ ). Columns show  $R$  for different radius scaling factors used to compensate for tissue shrinkage: (a)  $\eta = 1$ , (b)  $\eta = 1.3$  and (c)  $\eta = 1.5$ . While  $\eta = 1.3$  [31, 38] was used as an estimate for in-vivo conditions in the main manuscript,  $\eta = 1.0$  and  $\eta = 1.5$  represent the scenarios of no tissue shrinkage and very strong tissue shrinkage. Markers encode  $g_{\max}$  of existing clinical scanners and research scanners (assuming 90% of the nominal  $g_{\max}$ ). Line colors indicate different SNR baseline levels. While the reference SNR baseline level reflects our experimental conditions, increased SNR baseline levels assume an SNR increase through potential technical or acquisition advances. In addition, the SNR of a particular protocol candidate depends on the protocol parameters (see Eq. (13)). For our experimental protocol, baseline SNR levels would correspond to SNR values of 32 (reference), 56 (75% increased) and 80 (150% increased). (d-f) Optimal normalized root-mean-square error (NRMSE) as a function of maximum gradient amplitude ( $g_{\max}$ ) for different  $\eta$ , with definitions as in (a-c). Note that we optimized protocols by minimizing  $R$ , whereas NRMSE is an auxiliary metric.

Smoothing preserves the overall spatial pattern, maintaining the high-low trend across the genu, anterior midbody, midbody, posterior midbody, and splenium (see Fig. S10a-b). However, it reduces local variations, making the pattern less sensitive to noise but potentially also to finer structural details. The quantitative comparison with histology in Fig. S10c-d confirms that smoothing is necessary to reveal a significant correlation. Importantly, smoothing appears to enhance precision without introducing spurious correlations.

**Table S1 Parameters of optimal in-vivo dMRI protocols.** All dMRI protocols use two shells with  $\{60, 120\}$  diffusion gradient directions. The SNR baseline level describes the SNR conditions compared to our dMRI experiments. While the reference SNR baseline level corresponds to our experimental conditions, increased SNR baseline levels assume an SNR increase through potential technical or acquisition advances.  $\eta$  is a radius scaling factor compensating for tissue shrinkage in histology data, where  $\eta = 1.3$  reflects the value assumed in the main manuscript.  $g_{\min}$  and  $g_{\max}$  are the diffusion gradient amplitudes of the two diffusion shells;  $b_{\min} = 6 \text{ ms}/\mu\text{m}^2$  and  $b_{\max}$  denote the corresponding diffusion-weightings.  $\delta$  and  $\Delta$  are the gradient diffusion time and separation, consistent across shells. Echo time ( $T_E$ ) was estimated according to Eq. (11). The SNR was estimated using Eq. (13), reflecting not only the baseline SNR level, but also protocol parameter-dependent SNR variation. Pearson’s correlation coefficient ( $R$ ) and its associated  $p$ -value, as well as the normalized root-mean square-error (NRMSE), and the fitting success rate ( $S$ ) were computed as described in Section 4.7. The optimal dMRI protocol with maximum  $R$  per combination of  $\eta$  and SNR baseline level is highlighted in bold.

| SNR baseline   | $\eta$ | $g_{\max}$<br>[mT/m] | $g_{\min}$<br>[mT/m] | $b_{\max}$<br>[ms/ $\mu\text{m}^2$ ] | $\delta$<br>[ms] | $\Delta$<br>[ms] | $T_E$<br>[ms] | SNR          | $R$         | $p$         | NRMSE<br>[%] | $S$<br>[%]   |
|----------------|--------|----------------------|----------------------|--------------------------------------|------------------|------------------|---------------|--------------|-------------|-------------|--------------|--------------|
| reference      | 1.0    | 72                   | 30.9                 | 32.5                                 | 48               | 54               | 124           | 12.8         | 0.05        | $8.4e^{-1}$ | 80.3         | 54.2         |
|                |        | 180                  | 81.3                 | 29.4                                 | 24               | 30               | 76            | 27.3         | 0.16        | $4.5e^{-1}$ | 58.3         | 68.7         |
|                |        | 270                  | 119.9                | 30.4                                 | 18               | 24               | 64            | 33.2         | 0.26        | $1.8e^{-1}$ | 49.0         | 78.4         |
|                |        | <b>450</b>           | <b>167.0</b>         | <b>43.6</b>                          | <b>14</b>        | <b>20</b>        | <b>56</b>     | <b>38.0</b>  | <b>0.40</b> | $2.5e^{-2}$ | <b>38.8</b>  | <b>89.6</b>  |
|                | 1.3    | 72                   | 46.4                 | 14.4                                 | 36               | 42               | 100           | 18.6         | 0.09        | $7.0e^{-1}$ | 68.5         | 59.2         |
|                |        | 180                  | 81.3                 | 29.4                                 | 24               | 30               | 76            | 27.3         | 0.29        | $1.3e^{-1}$ | 46.1         | 82.5         |
|                |        | 270                  | 119.9                | 30.4                                 | 18               | 24               | 64            | 33.2         | 0.41        | $2.0e^{-2}$ | 38.5         | 91.4         |
|                |        | <b>450</b>           | <b>203.9</b>         | <b>29.2</b>                          | <b>12</b>        | <b>18</b>        | <b>52</b>     | <b>40.7</b>  | <b>0.54</b> | $< 1e^{-3}$ | <b>35.1</b>  | <b>97.5</b>  |
|                | 1.5    | 72                   | 40.1                 | 19.4                                 | 40               | 46               | 108           | 16.4         | 0.12        | $5.8e^{-1}$ | 61.8         | 65.3         |
|                |        | 180                  | 81.3                 | 29.4                                 | 24               | 30               | 76            | 27.3         | 0.36        | $4.6e^{-2}$ | 41.0         | 89.4         |
|                |        | 270                  | 119.9                | 30.4                                 | 18               | 24               | 64            | 33.2         | 0.47        | $4.8e^{-3}$ | 36.6         | 96.0         |
|                |        | <b>450</b>           | <b>203.9</b>         | <b>29.2</b>                          | <b>12</b>        | <b>18</b>        | <b>52</b>     | <b>40.7</b>  | <b>0.57</b> | $< 1e^{-3}$ | <b>37.4</b>  | <b>99.2</b>  |
| 75% increased  | 1.0    | 72                   | 35.0                 | 25.4                                 | 44               | 50               | 116           | 25.3         | 0.07        | $7.6e^{-1}$ | 71.8         | 57.9         |
|                |        | 180                  | 81.3                 | 29.4                                 | 24               | 30               | 76            | 47.7         | 0.31        | $1.2e^{-1}$ | 47.2         | 79.3         |
|                |        | 270                  | 119.9                | 30.4                                 | 18               | 24               | 64            | 58.1         | 0.46        | $9.9e^{-3}$ | 36.6         | 89.1         |
|                |        | <b>450</b>           | <b>203.9</b>         | <b>29.2</b>                          | <b>12</b>        | <b>18</b>        | <b>52</b>     | <b>71.1</b>  | <b>0.62</b> | $< 1e^{-3}$ | <b>29.1</b>  | <b>96.6</b>  |
|                | 1.3    | 72                   | 35.0                 | 25.4                                 | 44               | 50               | 116           | 25.3         | 0.16        | $4.6e^{-1}$ | 59.3         | 67.7         |
|                |        | 180                  | 81.3                 | 29.4                                 | 24               | 30               | 76            | 47.7         | 0.49        | $3.7e^{-3}$ | 34.1         | 92.7         |
|                |        | 270                  | 119.9                | 30.4                                 | 18               | 24               | 64            | 58.1         | 0.63        | $< 1e^{-3}$ | 30.2         | 97.6         |
|                |        | <b>450</b>           | <b>203.9</b>         | <b>29.2</b>                          | <b>12</b>        | <b>18</b>        | <b>52</b>     | <b>71.1</b>  | <b>0.72</b> | $< 1e^{-3}$ | <b>32.0</b>  | <b>99.7</b>  |
|                | 1.5    | 72                   | 40.1                 | 19.4                                 | 40               | 46               | 108           | 28.7         | 0.23        | $2.7e^{-1}$ | 52.2         | 75.1         |
|                |        | 180                  | 81.3                 | 29.4                                 | 24               | 30               | 76            | 47.7         | 0.58        | $< 1e^{-3}$ | 31.7         | 96.9         |
|                |        | 270                  | 119.9                | 30.4                                 | 18               | 24               | 64            | 58.1         | 0.68        | $< 1e^{-3}$ | 32.1         | 99.3         |
|                |        | <b>450</b>           | <b>203.9</b>         | <b>29.2</b>                          | <b>12</b>        | <b>18</b>        | <b>52</b>     | <b>71.1</b>  | <b>0.73</b> | $< 1e^{-3}$ | <b>36.1</b>  | <b>100.0</b> |
| 150% increased | 1.0    | 72                   | 35.0                 | 25.4                                 | 44               | 50               | 116           | 36.2         | 0.11        | $6.3e^{-1}$ | 66.8         | 61.4         |
|                |        | 180                  | 81.3                 | 29.4                                 | 24               | 30               | 76            | 68.1         | 0.43        | $1.9e^{-2}$ | 39.0         | 86.1         |
|                |        | 270                  | 119.9                | 30.4                                 | 18               | 24               | 64            | 83.0         | 0.60        | $< 1e^{-3}$ | 29.4         | 94.2         |
|                |        | <b>450</b>           | <b>203.9</b>         | <b>29.2</b>                          | <b>12</b>        | <b>18</b>        | <b>52</b>     | <b>101.6</b> | <b>0.74</b> | $< 1e^{-3}$ | <b>25.8</b>  | <b>98.6</b>  |
|                | 1.3    | 72                   | 40.1                 | 19.4                                 | 40               | 46               | 108           | 40.9         | 0.23        | $2.5e^{-1}$ | 52.6         | 74.1         |
|                |        | 180                  | 81.3                 | 29.4                                 | 24               | 30               | 76            | 68.1         | 0.63        | $< 1e^{-3}$ | 28.5         | 96.6         |
|                |        | 270                  | 119.9                | 30.4                                 | 18               | 24               | 64            | 83.0         | 0.74        | $< 1e^{-3}$ | 27.8         | 99.2         |
|                |        | <b>450</b>           | <b>203.9</b>         | <b>29.2</b>                          | <b>12</b>        | <b>18</b>        | <b>52</b>     | <b>101.6</b> | <b>0.79</b> | $< 1e^{-3}$ | <b>31.3</b>  | <b>100.0</b> |
|                | 1.5    | 72                   | 35.0                 | 25.4                                 | 44               | 50               | 116           | 36.2         | 0.33        | $8.5e^{-2}$ | 44.7         | 82.3         |
|                |        | 180                  | 81.3                 | 29.4                                 | 24               | 30               | 76            | 68.1         | 0.70        | $< 1e^{-3}$ | 28.8         | 98.8         |
|                |        | 270                  | 119.9                | 30.4                                 | 18               | 24               | 64            | 83.0         | 0.77        | $< 1e^{-3}$ | 31.1         | 99.8         |
|                |        | <b>450</b>           | <b>190.8</b>         | <b>33.4</b>                          | <b>12</b>        | <b>20</b>        | <b>54</b>     | <b>98.2</b>  | <b>0.79</b> | $< 1e^{-3}$ | <b>35.6</b>  | <b>100.0</b> |

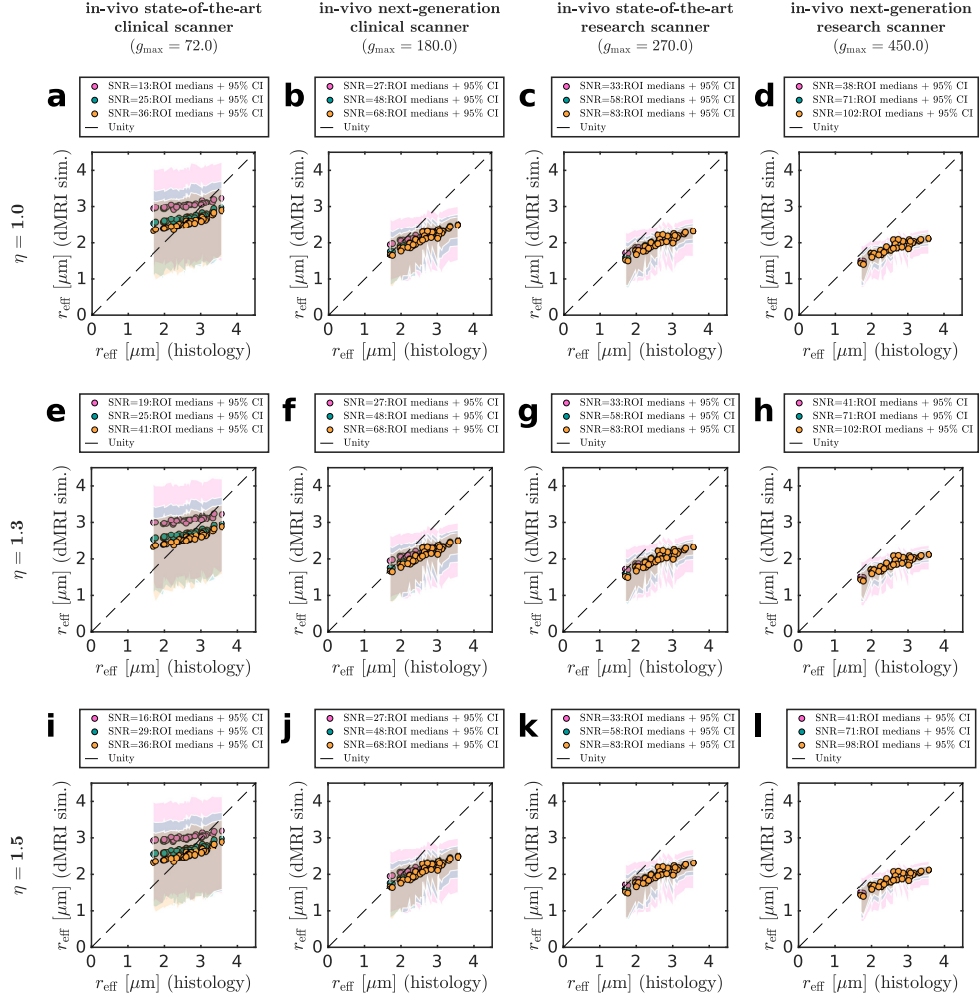

**Fig. S8** Estimated  $r_{\text{eff}}$  from optimal in-vivo dMRI protocols. The plots show  $r_{\text{eff}}$  derived from dMRI simulations with optimal protocols against the histological  $r_{\text{eff}}$  for various maximum gradient amplitudes  $g_{\text{max}}$  of existing/upcoming scanners (columns), assuming 90 % of nominal values. The  $\eta$  values (rows) denote radius scaling factors compensating for tissue shrinkage in histology data. While  $\eta = 1.3$  reflects the value assumed in the main manuscript,  $\eta = 1$  and  $\eta = 1.5$  reflect more extreme cases of no tissue shrinkage or very strong tissue shrinkage. Markers represent histological ROIs in Fig. 1a. The 95 % confidence interval for ROIs (shaded areas) was computed across 1000 noise realizations. Colors indicate different SNR baseline levels. While the reference SNR baseline level reflects our experimental conditions, increased SNR baseline levels assume an SNR increase through potential technical or acquisition advances. In addition, the SNR of a particular protocol candidate depends on the protocol parameters (see Eq. (13)). See Table S1 for the full set of protocol parameters and metrics for protocols shown here.

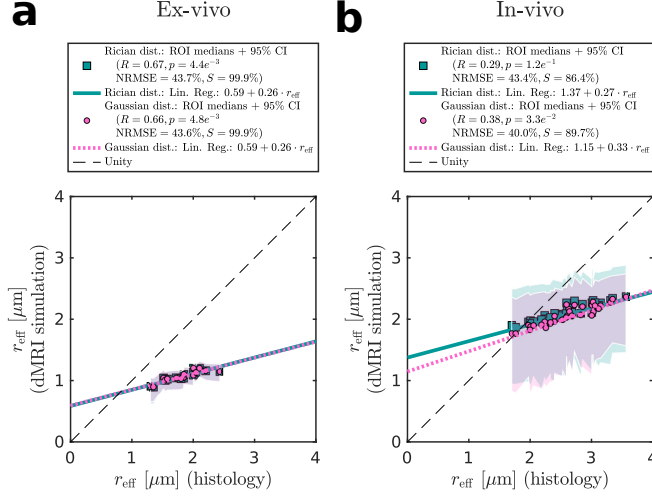

**Fig. S9 Influence of Gaussian and Rician noise on  $r_{\text{eff}}$  estimation.** Comparison of  $r_{\text{eff}}$  from dMRI simulations against histological values for our experimental (a) ex-vivo and (a) in-vivo dMRI protocols. Results are shown for both Gaussian and Rician noise (see legend). Markers represent histological ROIs in Fig. 1a. The 95 % confidence intervals (shaded areas) were computed across 1000 noise realizations. The dashed lines illustrate theoretical perfect agreement. The legends provide metrics computed over all ROIs, including Pearson's correlation coefficient ( $R$ ) and the corresponding  $p$ -value, the normalized root-mean-square error (NRMSE), and the fitting success rate ( $S$ ) (see Section 4.7 for metric definitions).

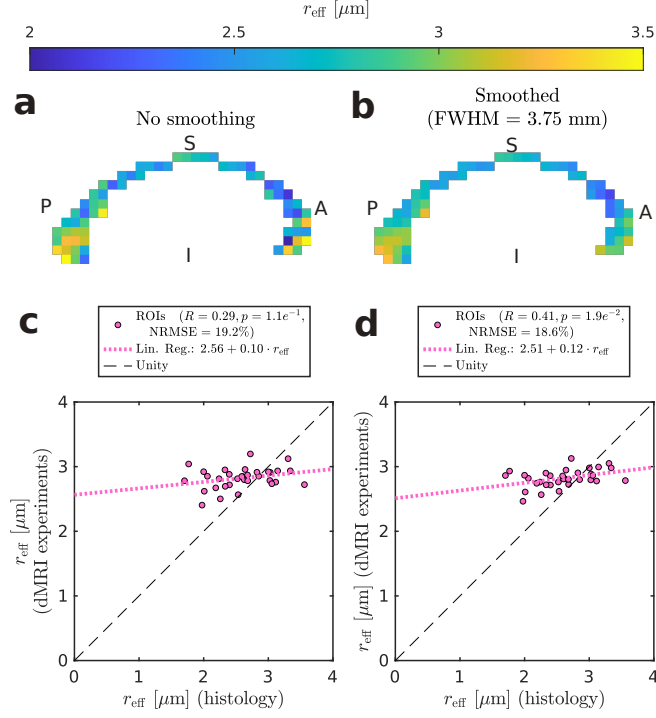

**Fig. S10 Impact of spatial smoothing on in-vivo dMRI-based  $r_{\text{eff}}$ .** (a-b) Spatial patterns of  $r_{\text{eff}}$  across the corpus callosum: (a) before smoothing and (b) after smoothing with FWHM = 3.75 mm ( $1.5 \times$  voxel size). Patterns show mid-sagittal section of the corpus callosum for an exemplary subject in native space. (c-d) Quantitative comparison of in-vivo dMRI-based group-average  $r_{\text{eff}}$  against histology. The group-average  $r_{\text{eff}}$  was computed from different per-subject maps: (c) from unsmoothed maps, as illustrated in (a), and (d) from smoothed maps, as illustrated in (b). Markers represent histological ROIs in Fig. 1a. The dashed lines illustrate theoretical perfect agreement. The legends provide metrics computed over all ROIs, including Pearson's correlation coefficient ( $R$ ) and the corresponding  $p$ -value, the normalized root-mean-square error (NRMSE) (see Section 4.7 for metric definitions).
